# Supplementary material for: PlGF mediates neutrophil elastase-induced airway epithelial cell apoptosis and emphysema
Source: PubMed Central journal article supplement (PMC4267747; doi:10.1186/s12931-014-0106-1), 2014-09-05

Fig. S1

(A) Endothelial cell

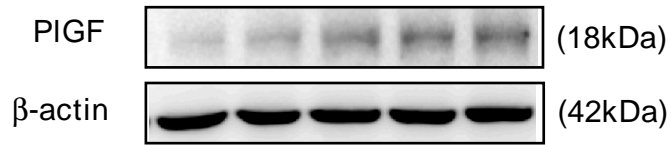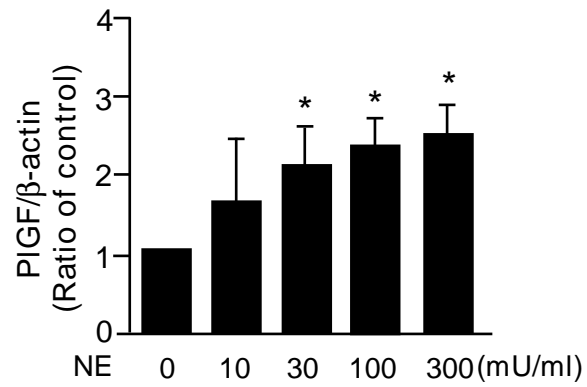

(B) Fibroblast

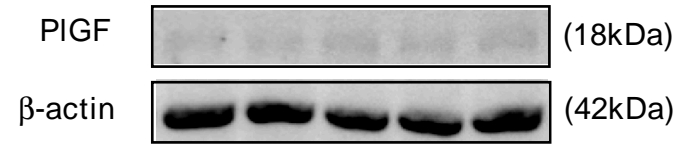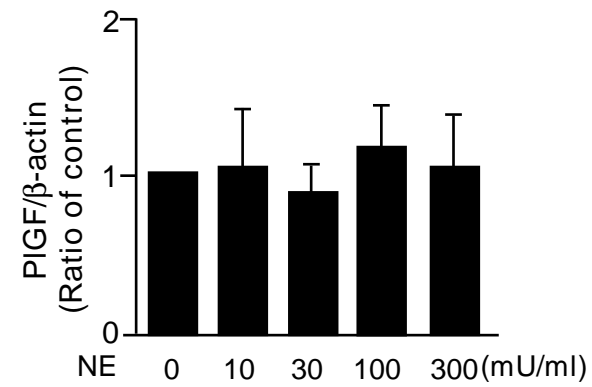

(C)

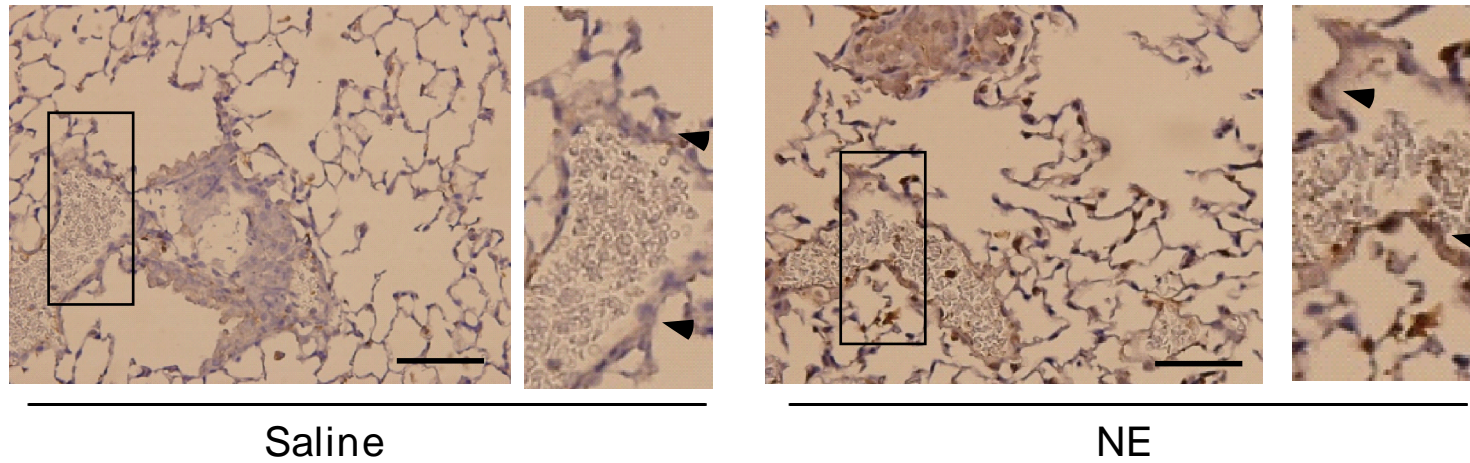

Supplement: 12931_2014_106_MOESM2_ESM.pdf [file 12931_2014_106_MOESM2_ESM.pdf]
