# Supplementary material for: PlGF mediates neutrophil elastase-induced airway epithelial cell apoptosis and emphysema
Source: PubMed Central journal article supplement (PMC4267747; doi:10.1186/s12931-014-0106-1), 2014-09-05

Fig. S2

(A)

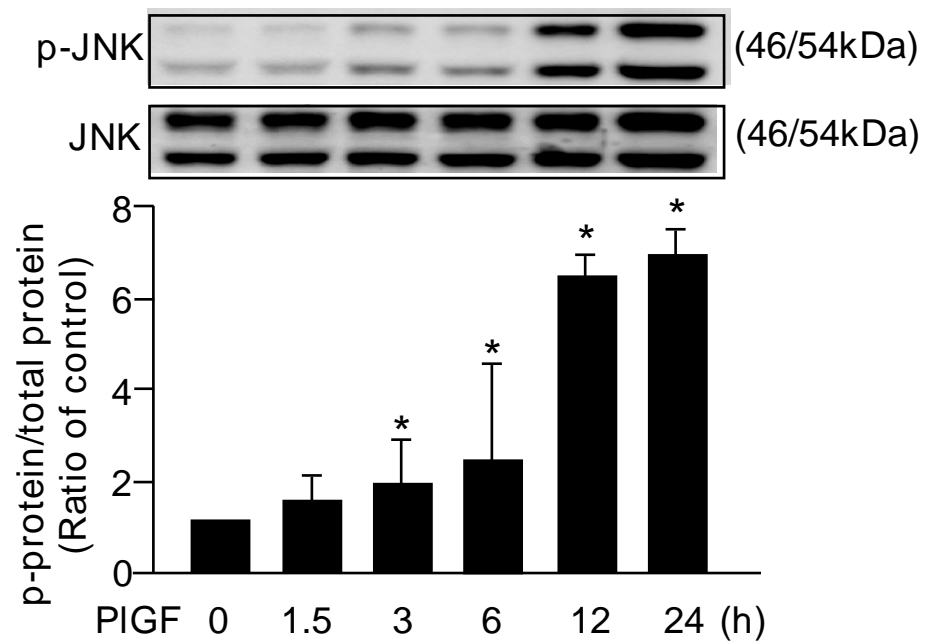

(B)

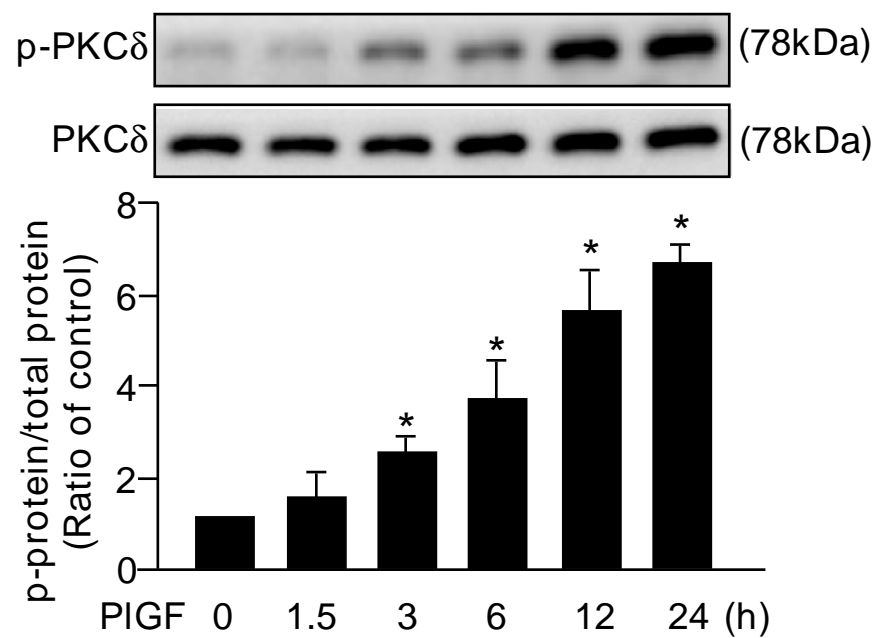

Supplement: 12931_2014_106_MOESM3_ESM.pdf [file 12931_2014_106_MOESM3_ESM.pdf]
